# Supplementary figures and images for: Histone deacetylase inhibitors prevent activation-induced cell death and promote anti-tumor immunity
Source: PubMed Central journal article supplement — Oncogene. 2015 Mar 9;34(49):5960–70. doi: 10.1038/onc.2015.46 (PMC4672172; doi:10.1038/onc.2015.46), 2015-03-09

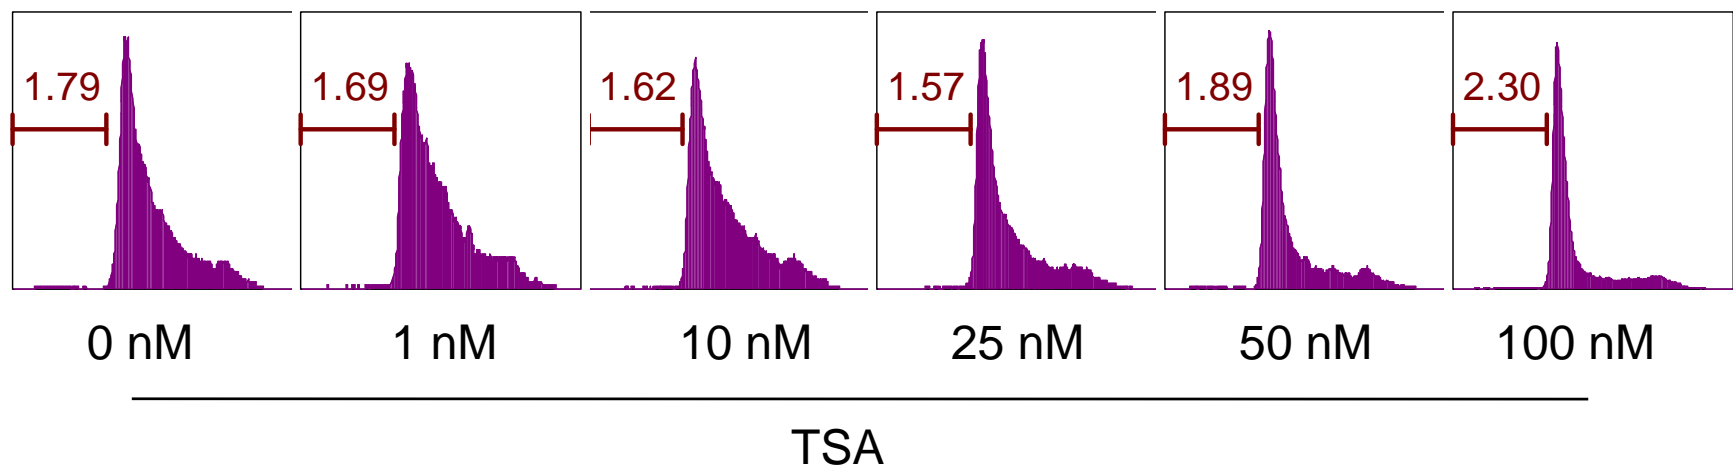

Supplementary Figure 9

Supplement: onc201546x10.pdf [file onc201546x10.pdf]

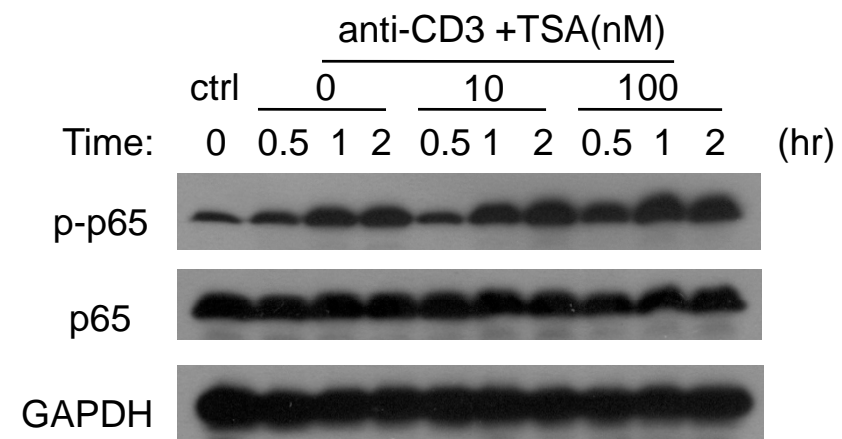

Supplementary Figure 10

Supplement: onc201546x11.pdf [file onc201546x11.pdf]

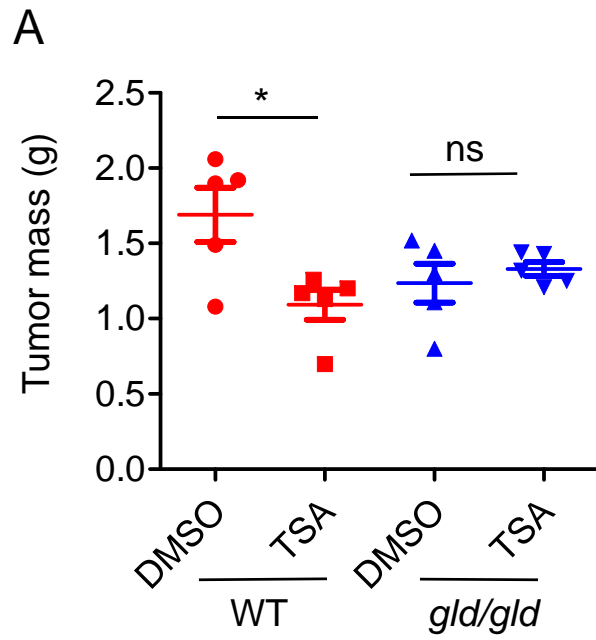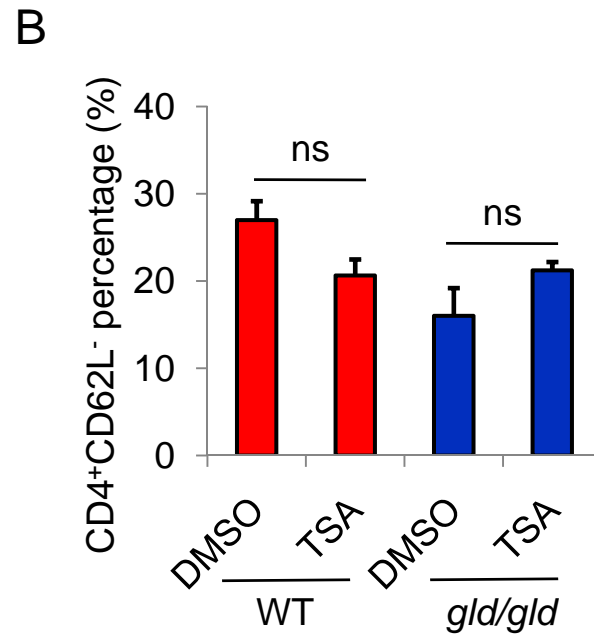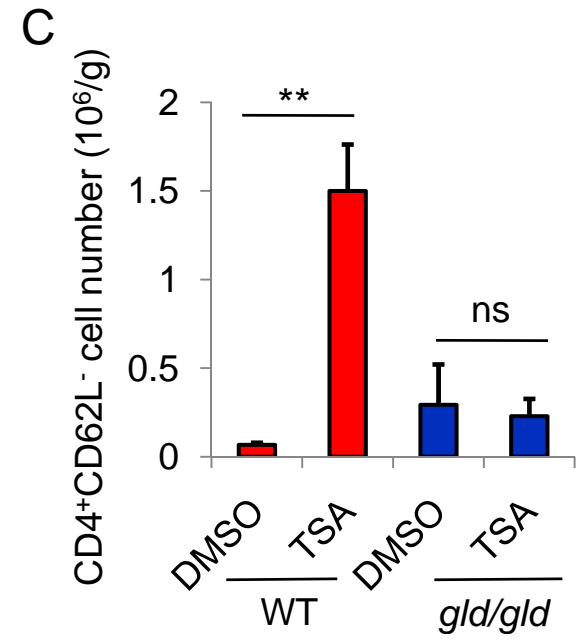

Supplementary Figure 11

Supplement: onc201546x12.pdf [file onc201546x12.pdf]

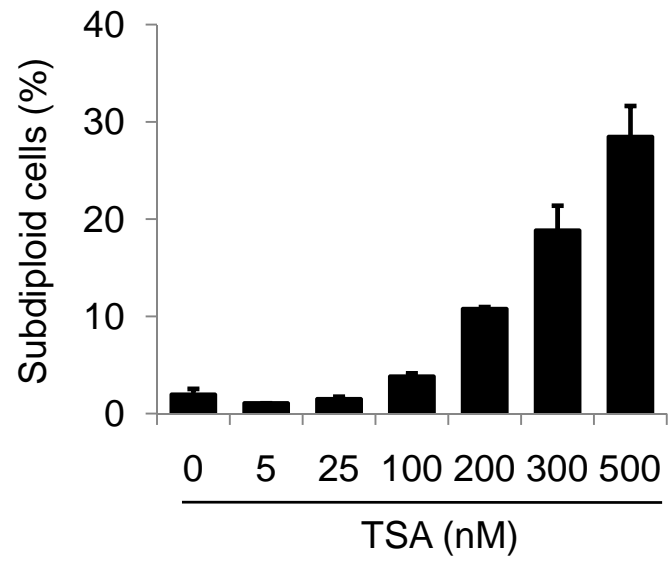

Supplementary Figure 1

Supplement: onc201546x2.pdf [file onc201546x2.pdf]

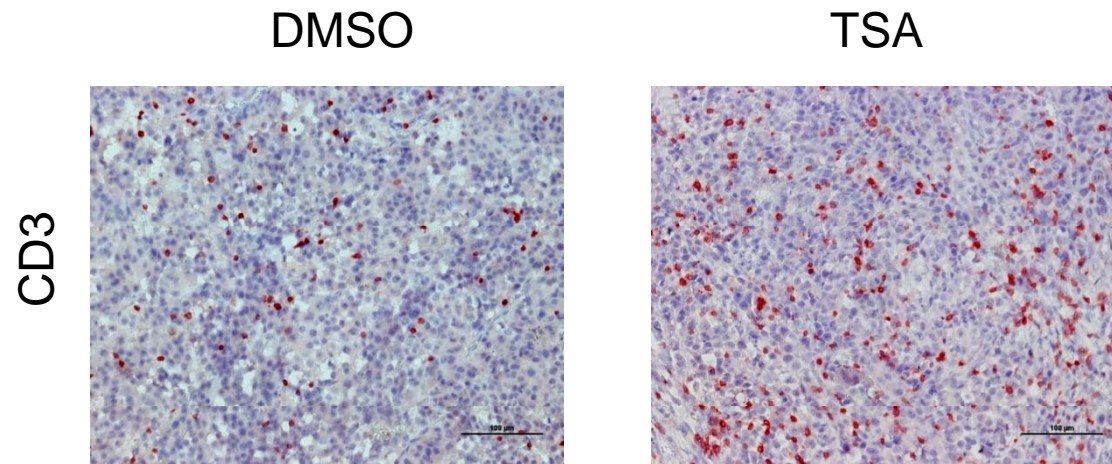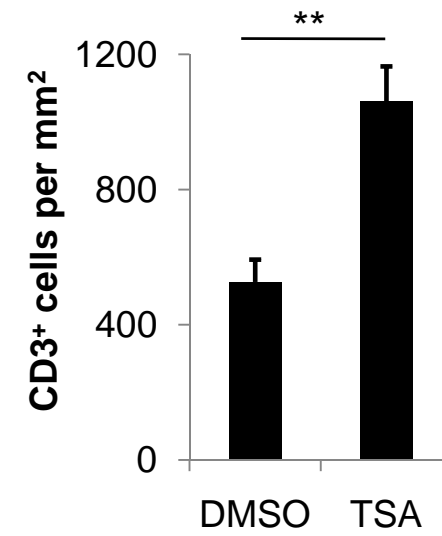

Supplementary Figure 2

Supplement: onc201546x3.pdf [file onc201546x3.pdf]

Gated on CD3<sup>+</sup> cells

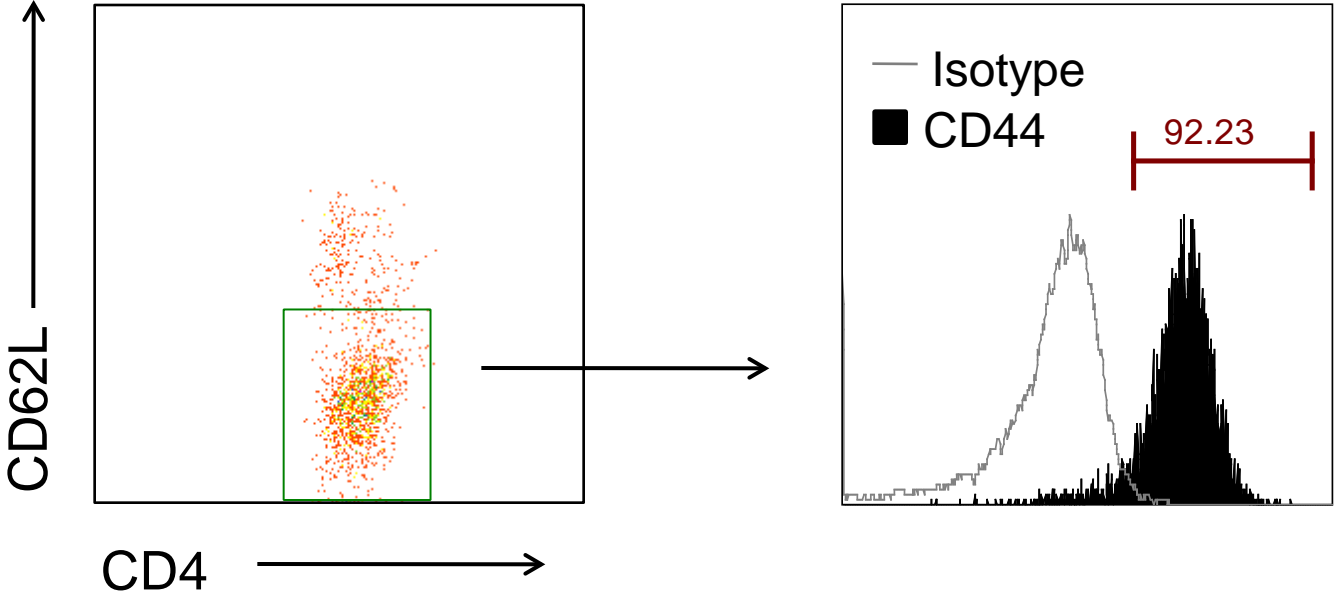

Supplementary Figure 2

Supplement: onc201546x4.pdf [file onc201546x4.pdf]

A Gated on CD3<sup>+</sup> cells

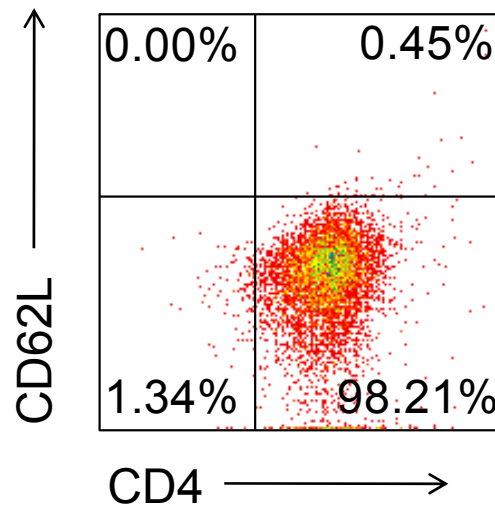

B

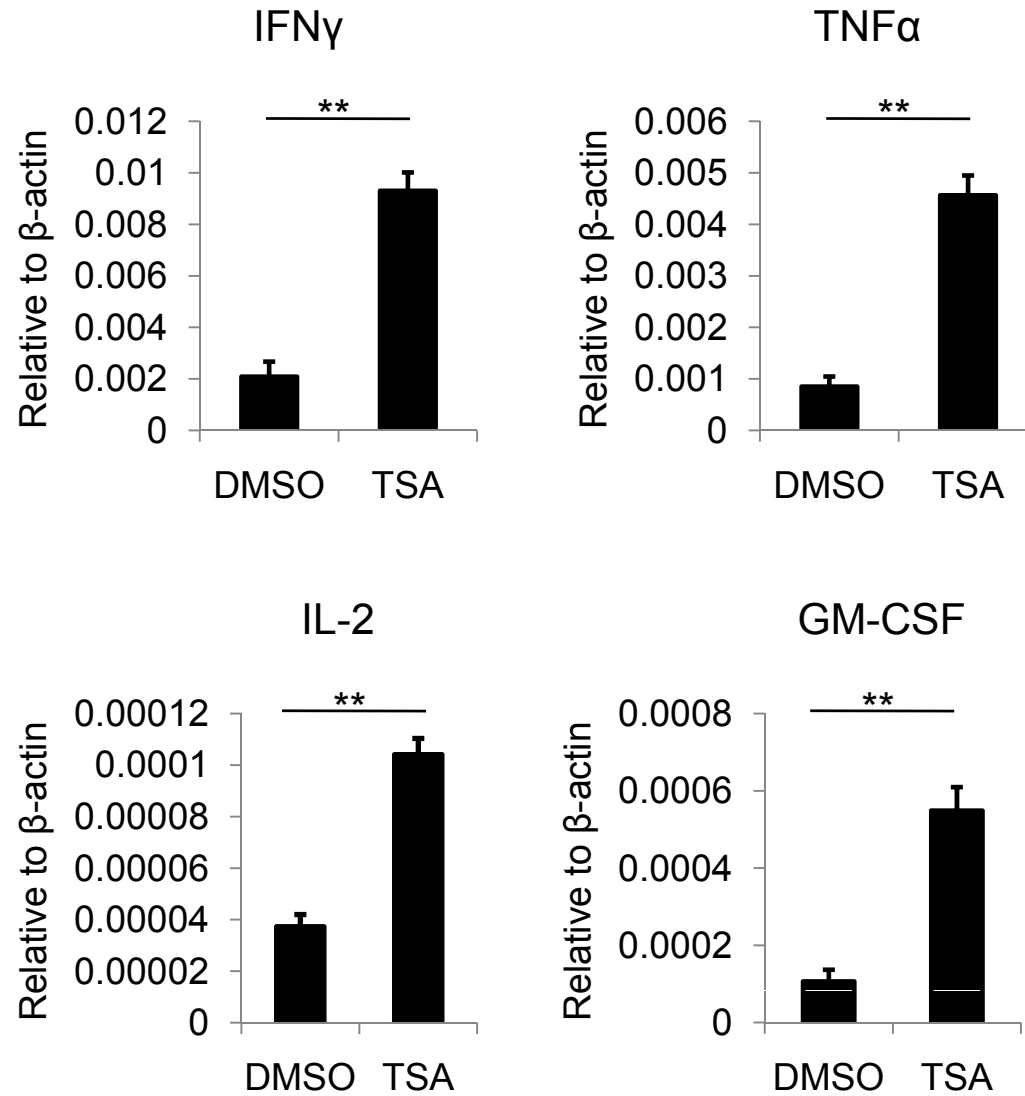

Supplementary Figure 4

Supplement: onc201546x5.pdf [file onc201546x5.pdf]

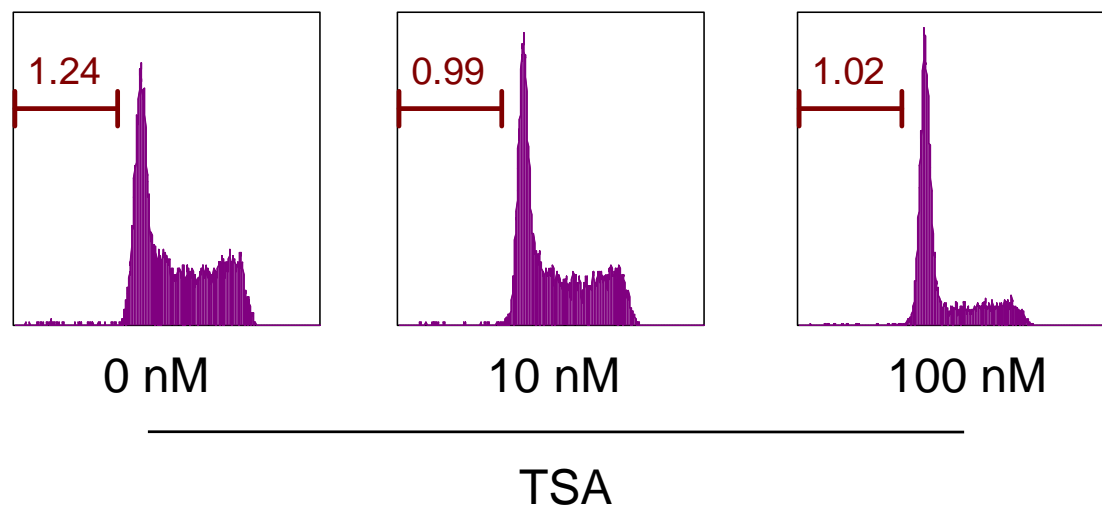

Supplementary Figure 5

Supplement: onc201546x6.pdf [file onc201546x6.pdf]

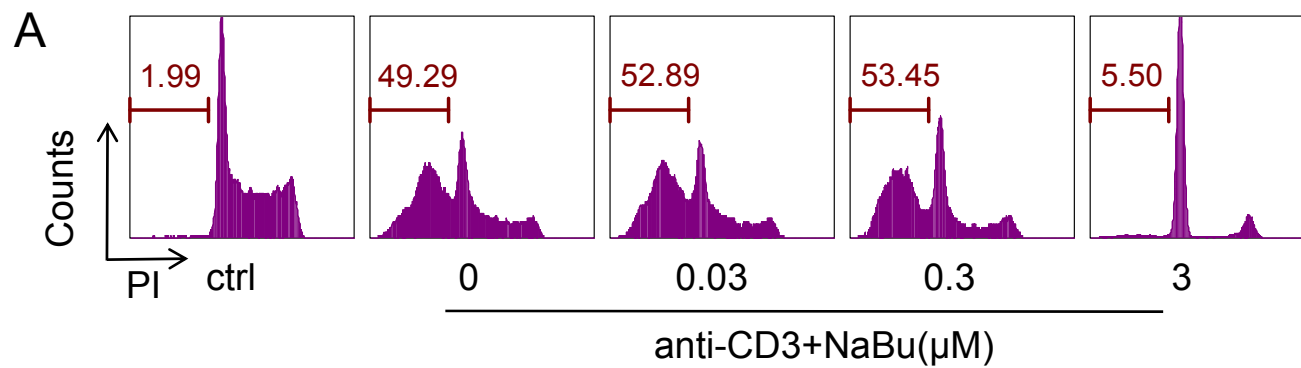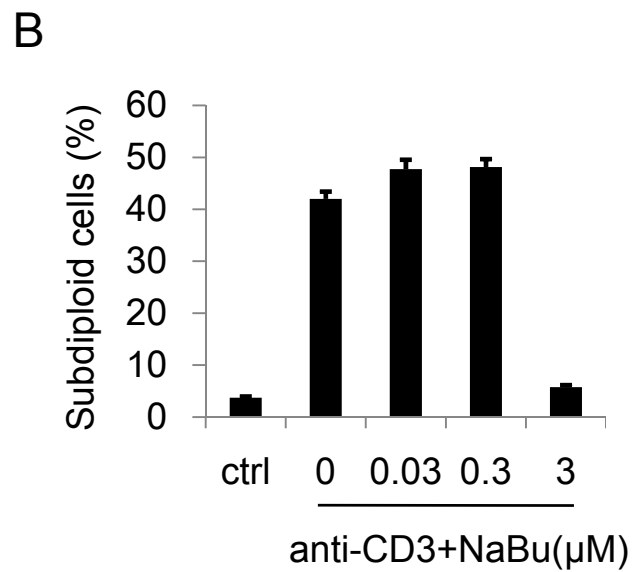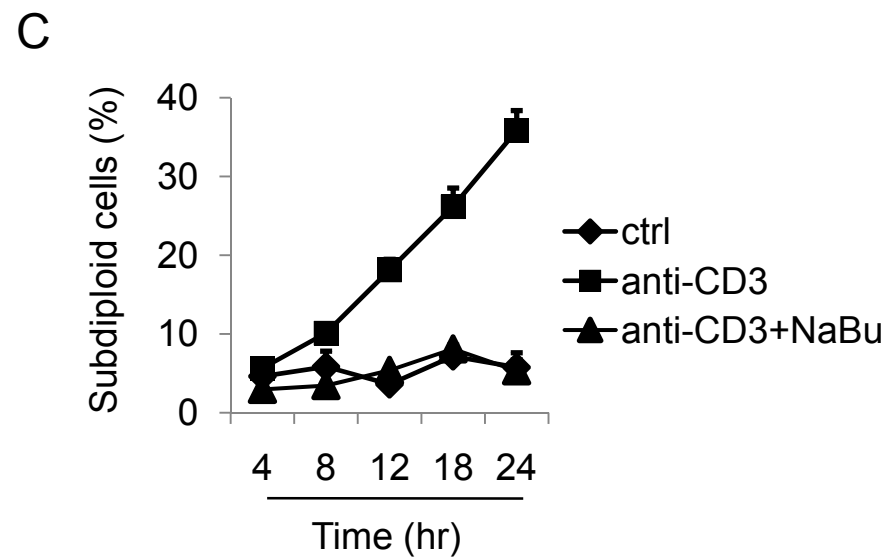

Supplementary Figure 6

Supplement: onc201546x7.pdf [file onc201546x7.pdf]

A

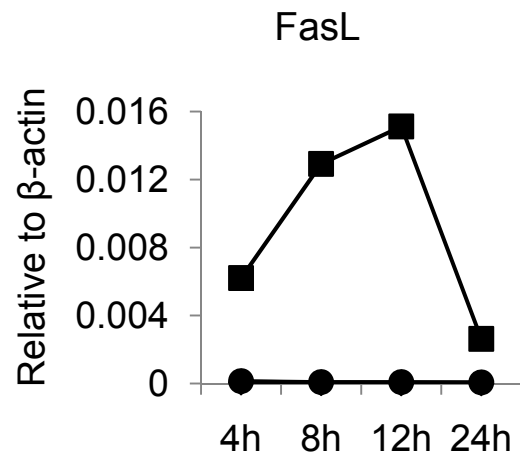

B

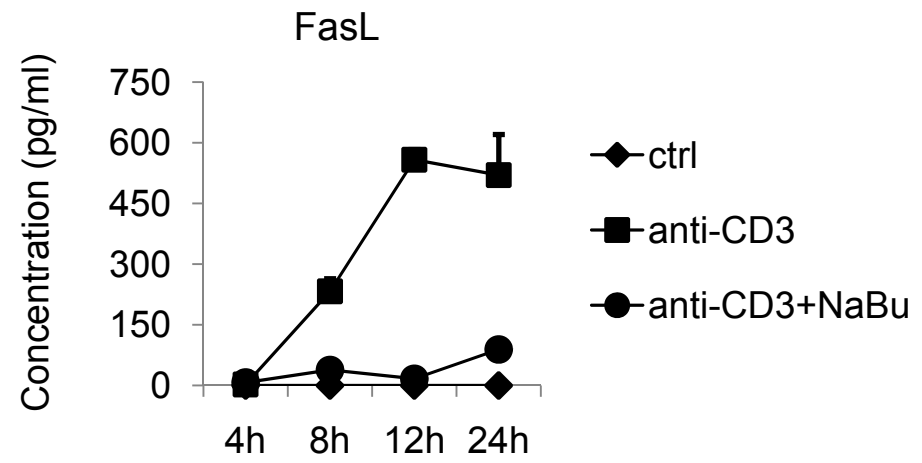

Supplementary Figure 7

Supplement: onc201546x8.pdf [file onc201546x8.pdf]

A

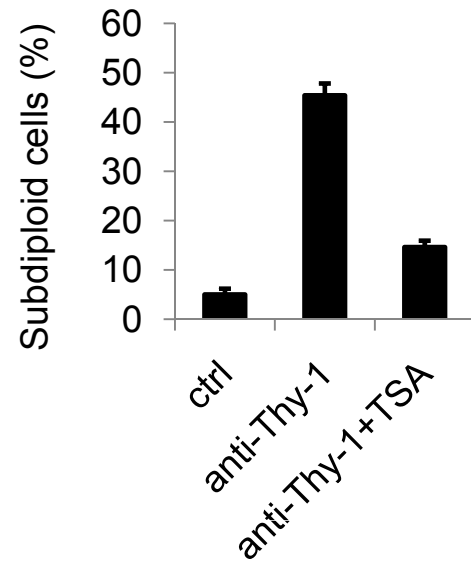

B

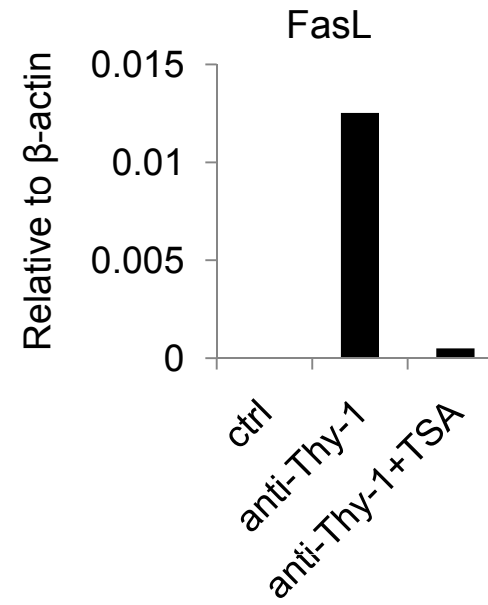

Supplementary Figure 8

Supplement: onc201546x9.pdf [file onc201546x9.pdf]
